# Supplementary material for: Genome-first evaluation with exome sequence and clinical data uncovers underdiagnosed genetic disorders in a large healthcare system
Source: PubMed Central journal article supplement — Cell Rep Med. 2024 Apr 19;5(5):101518. doi: 10.1016/j.xcrm.2024.101518 (PMC11148562; doi:10.1016/j.xcrm.2024.101518), 2024-04-19
Supplement: mmc1.pdf [file mmc1.pdf]

**Cell Reports Medicine, Volume 5**

**Supplemental information**

**Genome-first evaluation with exome sequence  
and clinical data uncovers underdiagnosed  
genetic disorders in a large healthcare system**

**Iain S. Forrest, Áine Duffy, Joshua K. Park, Ha My T. Vy, Louis R. Pasquale, Girish N. Nadkarni, Judy H. Cho, and Ron Do**

## SUPPLEMENTARY FIGURES

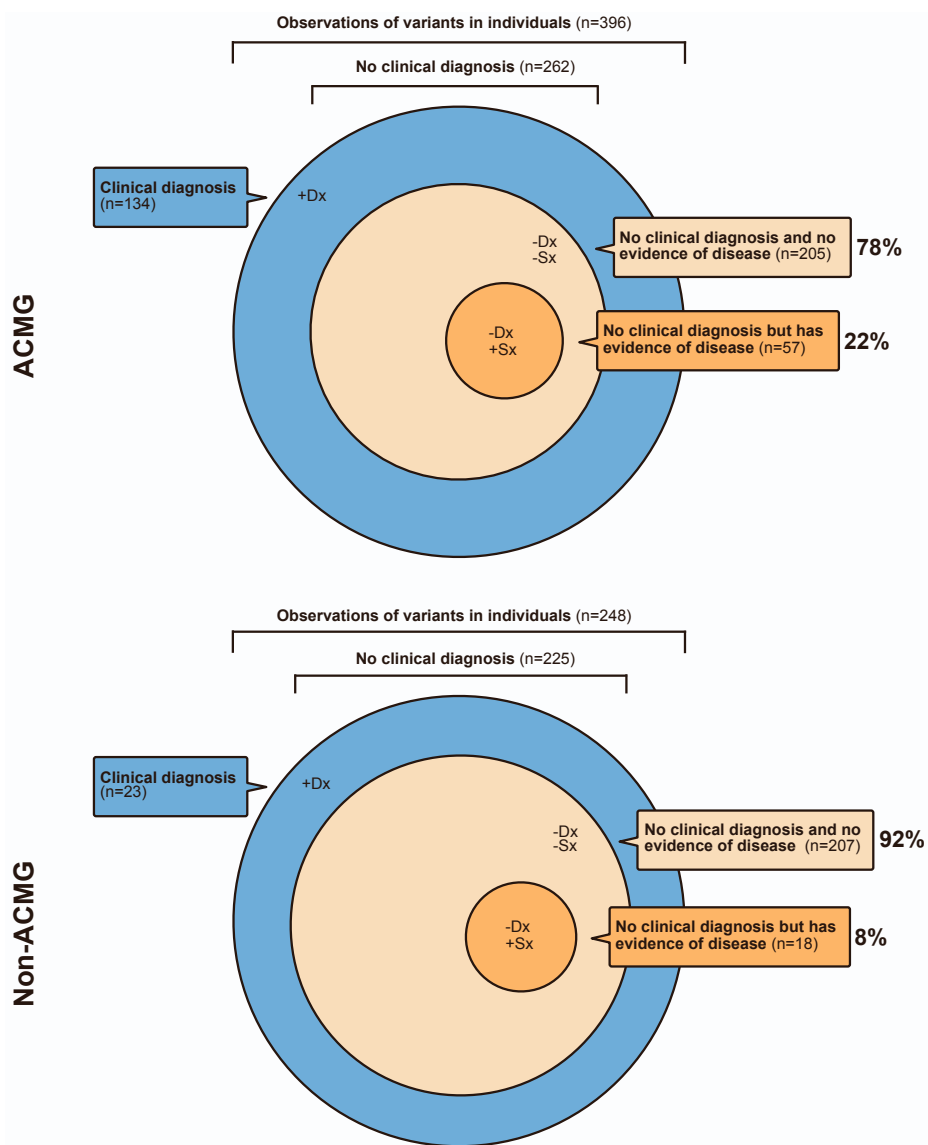

**Supplementary Figure 1. Clinical diagnosis and phenotypes of observations in individuals of pathogenic/likely pathogenic or predicted loss-of-function (P/LP/LoF) variants in genes from the American College of Medical Genetics and Genomics' Recommendations for Reporting of Secondary Findings (ACMG SF v3.1).** Observations of variants in individuals were categorized into three distinct groups: 1) clinically diagnosed (+Dx), the individual with a P/LP/LoF variant had a prior clinical diagnosis for the genetic disorder corresponding to the variant; 2) no clinical diagnosis and no evidence of disease (-Dx -Sx), the individual with a P/LP/LoF variant lacked a prior clinical diagnosis for the corresponding genetic disorder and had no electronic health record (EHR) evidence of disease symptoms or findings detected; and 3) no clinical diagnosis but has evidence of disease (-Dx +Sx), the individual with a P/LP/LoF variant lacked a clinical diagnosis for the corresponding genetic disorder, but has EHR evidence of disease symptoms or findings. Related to Figure 2.

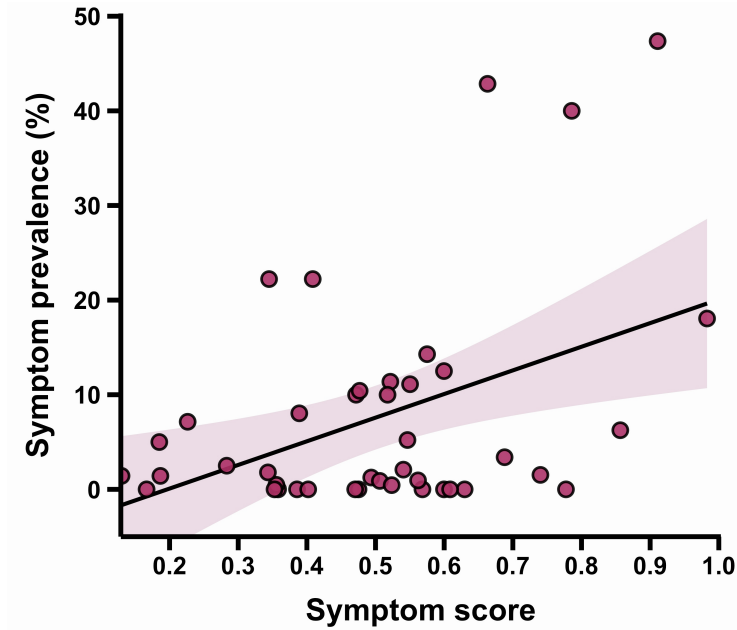

**Supplementary Figure 2. Prevalence of symptoms detected in individuals without a clinical diagnosis carrying pathogenic/likely pathogenic or loss-of-function (P/LP/LoF) variants.** P/LP variants, reported in ClinVar with a minimum review status of two; LoF variants, variants with predicted LoF consequence annotated by Variant Effect Predictor; clinical diagnosis, clinical diagnosis of disease corresponding to a variant; symptom prevalence, prevalence of symptom detected in observations of variants in individuals without a clinical diagnosis; symptom score, on an ordinal scale ranging from 0 (lowest risk of hospitalization and death) to 1 (highest risk of hospitalization and death) from a previously published study<sup>1</sup>. Related to Figure 4.

1. Gottlieb A, Hoehndorf R, Dumontier M, Altman RB. Ranking adverse drug reactions with crowdsourcing. *J Med Internet Res* 2015; **17**. DOI:10.2196/jmir.3962.

## SUPPLEMENTARY TABLES

**Supplementary Table 1. Summary of 54 monogenic disease predisposition genes containing pathogenic/likely pathogenic or predicted loss-of-function (P/LP/LoF) variants including a subset in the American College of Medical Genetics and Genomics' Recommendations for Reporting of Secondary Findings list of 78 genes (ACMG SF v3.1). Related to Table 2.**

| Disease                       | Gene          | ACMG SF v3.1 |
|-------------------------------|---------------|--------------|
| Amyotrophic lateral sclerosis | <i>FIG4</i>   | FALSE        |
| Amyotrophic lateral sclerosis | <i>FUS</i>    | FALSE        |
| Amyotrophic lateral sclerosis | <i>OPTN</i>   | FALSE        |
| Amyotrophic lateral sclerosis | <i>SETX</i>   | FALSE        |
| Cardiomyopathy                | <i>ABCC9</i>  | FALSE        |
| Cardiomyopathy                | <i>ACTN2</i>  | FALSE        |
| Cardiomyopathy                | <i>CSRP3</i>  | FALSE        |
| Cardiomyopathy                | <i>DES</i>    | TRUE         |
| Cardiomyopathy                | <i>DSG2</i>   | TRUE         |
| Cardiomyopathy                | <i>DSP</i>    | TRUE         |
| Cardiomyopathy                | <i>EYA4</i>   | FALSE        |
| Cardiomyopathy                | <i>MYBPC3</i> | TRUE         |
| Cardiomyopathy                | <i>MYH6</i>   | FALSE        |
| Cardiomyopathy                | <i>MYH7</i>   | TRUE         |
| Cardiomyopathy                | <i>NEXN</i>   | FALSE        |
| Cardiomyopathy                | <i>PKP2</i>   | TRUE         |
| Cardiomyopathy                | <i>PRKAG2</i> | TRUE         |
| Cardiomyopathy                | <i>RBM20</i>  | TRUE         |
| Cardiomyopathy                | <i>RYR2</i>   | TRUE         |
| Cardiomyopathy                | <i>SCN5A</i>  | TRUE         |
| Cardiomyopathy                | <i>SDHA</i>   | FALSE        |
| Cardiomyopathy                | <i>TNNI3</i>  | TRUE         |
| Cardiomyopathy                | <i>TNNT2</i>  | TRUE         |
| Cardiomyopathy                | <i>TTN</i>    | TRUE         |
| Cardiomyopathy                | <i>VCL</i>    | FALSE        |
| Colorectal cancer             | <i>APC</i>    | TRUE         |
| Colorectal cancer             | <i>BUB1B</i>  | FALSE        |
| Colorectal cancer             | <i>FLCN</i>   | FALSE        |
| Colorectal cancer             | <i>MLH1</i>   | TRUE         |
| Colorectal cancer             | <i>MLH3</i>   | FALSE        |
| Colorectal cancer             | <i>MSH2</i>   | TRUE         |
| Colorectal cancer             | <i>TGFBR2</i> | FALSE        |
| Endometrial cancer            | <i>MSH6</i>   | TRUE         |
| Familial breast cancer        | <i>BRCA1</i>  | TRUE         |
| Familial breast cancer        | <i>BRCA2</i>  | TRUE         |
| Familial breast cancer        | <i>PALB2</i>  | TRUE         |
| Familial breast cancer        | <i>PPM1D</i>  | FALSE        |
| Familial hypercholesterolemia | <i>LDLR</i>   | TRUE         |

|                      |               |       |
|----------------------|---------------|-------|
| Monogenic diabetes   | <i>KCNJ11</i> | FALSE |
| Prostate cancer      | <i>BRCA2</i>  | FALSE |
| Retinitis pigmentosa | <i>AIP1</i>   | FALSE |
| Retinitis pigmentosa | <i>CRB1</i>   | FALSE |
| Retinitis pigmentosa | <i>DHDDS</i>  | FALSE |
| Retinitis pigmentosa | <i>KLHL7</i>  | FALSE |
| Retinitis pigmentosa | <i>NR2E3</i>  | FALSE |
| Retinitis pigmentosa | <i>NRL</i>    | FALSE |
| Retinitis pigmentosa | <i>PDE6B</i>  | FALSE |
| Retinitis pigmentosa | <i>PROM1</i>  | FALSE |
| Retinitis pigmentosa | <i>PRPF8</i>  | FALSE |
| Retinitis pigmentosa | <i>PRPH2</i>  | FALSE |
| Retinitis pigmentosa | <i>RHO</i>    | FALSE |
| Retinitis pigmentosa | <i>RLBP1</i>  | FALSE |
| Retinitis pigmentosa | <i>RPI</i>    | FALSE |
| Retinitis pigmentosa | <i>RPE65</i>  | TRUE  |
| Retinitis pigmentosa | <i>SEMA4A</i> | FALSE |

**Supplementary Table 2. Summary of baseline demographic traits by genetic disorder.** Related to Figure 4 and Table 1.

| <b>Disease</b>                | <b>Age, mean (SD)<br/>years</b> | <b>Female, n (%)</b> | <b>European, n (%)</b> | <b>African, n (%)</b> | <b>Hispanic, n (%)</b> | <b>Asian, n (%)</b> | <b>Other, n (%)</b> |
|-------------------------------|---------------------------------|----------------------|------------------------|-----------------------|------------------------|---------------------|---------------------|
| Alzheimer disease             | 75 (13)                         | 464 (63)             | 161 (22)               | 185 (25)              | 317 (43)               | 11 (1.5)            | 65 (8.8)            |
| Amyotrophic lateral sclerosis | 72 (12)                         | 5 (71)               | 4 (57)                 | 0 (0)                 | 3 (43)                 | 0 (0)               | 0 (0)               |
| Breast cancer                 | 64 (14)                         | 1488 (100)           | 580 (39)               | 335 (23)              | 409 (27)               | 43 (2.9)            | 121 (8.1)           |
| Cardiomyopathy                | 67 (14)                         | 344 (42)             | 226 (27)               | 248 (30)              | 250 (30)               | 21 (2.6)            | 78 (9.5)            |
| Colorectal cancer             | 72 (11)                         | 122 (56)             | 59 (27)                | 58 (27)               | 78 (36)                | 3 (1.4)             | 20 (9.2)            |
| Endometrial cancer            | 69 (11)                         | 115 (100)            | 25 (22)                | 30 (26)               | 51 (44)                | 2 (1.7)             | 7 (6.1)             |
| Hypercholesterolemia          | 67 (13)                         | 2777 (62)            | 1437 (32)              | 1114 (25)             | 1391 (31)              | 158 (3.5)           | 360 (8.1)           |
| Prostate cancer               | 75 (9.7)                        | 0 (100)              | 177 (37)               | 154 (32)              | 105 (22)               | 6 (1.3)             | 32 (6.8)            |
| Retinitis pigmentosa          | 63 (15)                         | 7 (47)               | 4 (27)                 | 6 (40)                | 5 (33)                 | 0 (0)               | 0 (0)               |
| Type 2 diabetes               | 67 (13)                         | 4113 (58)            | 1087 (15)              | 2208 (31)             | 2850 (40)              | 250 (3.5)           | 649 (9.2)           |

Clinical diagnoses were extracted as International Classification of Diseases 10 (ICD-10) codes from the EHR and ancestries were self-reported. Other ancestry, miscellaneous ancestries other than those listed; n, number; SD, standard deviation.

**Supplementary Table 3. Study set of 303 pathogenic/likely pathogenic or predicted loss-of-function (P/LP/LoF) variants in 54 genes corresponding to nine genetic conditions.** Related to Figures 1-4 and Tables 1-2.

Dataset is available at: <http://dx.doi.org/10.17632/c2g66gycvx.1>.

**Supplementary Table 4. ICD-10 diagnosis codes for nine genetic disorders.** Related to Figures 1, 2, and 4, and Tables 1 and 2.

| <b>Disease</b>                | <b>ICD-10 diagnosis code</b>                                                                                                                       |
|-------------------------------|----------------------------------------------------------------------------------------------------------------------------------------------------|
| Amyotrophic lateral sclerosis | Amyotrophic lateral sclerosis ('G12.21')                                                                                                           |
| Cardiomyopathy                | Cardiomyopathies, including dilated and hypertrophic types ('I42*')                                                                                |
| Colorectal cancer             | Malignant neoplasm of the colon and/or rectum ('C18*', 'C19')                                                                                      |
| Endometrial cancer            | Malignant neoplasm of the endometrium ('C54.1')                                                                                                    |
| Breast cancer                 | Malignant neoplasm of the breast ('C50*')                                                                                                          |
| Familial hypercholesterolemia | Hypercholesterolemia, unspecified or familial ('E78.0*')                                                                                           |
| Prostate cancer               | Malignant neoplasm of the prostate, including personal history of prostate cancer and in situ carcinoma of the prostate ('C61', 'Z85.46', 'D07.5') |
| Retinitis pigmentosa          | Retinitis pigmentosa ('H35.52')                                                                                                                    |
| Monogenic diabetes            | Type 2 diabetes ('E11*')                                                                                                                           |

\*, any ICD-10 diagnosis code below the stated parent level (e.g., 'F90\*' includes 'F90.1').



**Supplementary Table 5. Disease-specific medications for nine genetic disorders with prescriptions identified in the electronic health record.** Related to Figures 1 and 4, and Table 2.

| <b>Disease</b>                | <b>Medications</b>                                                                                                                                                                                                                                                                                                                                                                                                                                                                                                                                                                                                                                                                                                                      |
|-------------------------------|-----------------------------------------------------------------------------------------------------------------------------------------------------------------------------------------------------------------------------------------------------------------------------------------------------------------------------------------------------------------------------------------------------------------------------------------------------------------------------------------------------------------------------------------------------------------------------------------------------------------------------------------------------------------------------------------------------------------------------------------|
| Amyotrophic lateral sclerosis | riluzole                                                                                                                                                                                                                                                                                                                                                                                                                                                                                                                                                                                                                                                                                                                                |
| Cardiomyopathy                | ivabradine, dexrazoxane                                                                                                                                                                                                                                                                                                                                                                                                                                                                                                                                                                                                                                                                                                                 |
| Colorectal cancer             | oxaliplatin, panitumumab, tipiracil                                                                                                                                                                                                                                                                                                                                                                                                                                                                                                                                                                                                                                                                                                     |
| Endometrial cancer            | --                                                                                                                                                                                                                                                                                                                                                                                                                                                                                                                                                                                                                                                                                                                                      |
| Familial breast cancer        | abemaciclib, adriamycin, anastrozole, arimidex, aromasin, capecitabine, carboplatin, cisplatin, cyclophosphamide, docetaxel, doxorubicin, exemestane, femara, femring, fl uorouracil, gemcitabine, goserelin, herceptin, ibandronate, ibrance, ixabepilone, lapat inib, letrozole, lynparza, megace, methotrexate, methyltestosterone, mitomycin, navel bine, neratinib, olaparib, otrexup, paclitaxel, palbociclib, pertuzumab, raloxifene, ras uvo, tamoxifen, taxotere, toremifene, trastuzumab, tucatinib, verzenio, vinblastine, vi norelbine, xeloda, zoladex                                                                                                                                                                     |
| Familial hypercholesterolemia | atorvastatin, simvastatin, pravastatin, lovastatin, fluvastatin, pitavastatin, rosuvastatin , cholestyramine, colestipol, colesevelam, niacin, ezetimibe, alirocumab, evolocumab                                                                                                                                                                                                                                                                                                                                                                                                                                                                                                                                                        |
| Monogenic diabetes            | acarbose, actos, admelog, albiglutide, alogliptin, amaryl, avandia, canagliflozin, chlor propamide, cycloset, dapagliflozin, dulaglutide, empagliflozin, ertugliflozin, exenatid e, glimepiride, glinide, glipizide, glucophage, glucotrol, glumetza, glyburide, glyset, humalog, insulin, insulin degludec, insulin detemir, insulin glargine, insulin lispro, in vokana, januvia, jardiance, junior kwikpen, levemir, linagliptin, liraglutide, lixisenati de, metformin, miglitol, nateglinide, onglyza, ozempic, pioglitazone, pramlintide, pre cose, repaglinide, riomet, rosiglitazone, rybelsus, saxagliptin, saxenda, semaglutide, s itagliptin, starlix, steglatro, symlinpen, tanzeum, tradjenta, tresiba, trulicity, victoza |
| Prostate cancer               | degarelix, triptorelin, bicalutamide, flutamide, abiraterone, enalautamide, nilutamide, apalutamide, darolutamide, sipuleucel                                                                                                                                                                                                                                                                                                                                                                                                                                                                                                                                                                                                           |
| Retinitis pigmentosa          | --                                                                                                                                                                                                                                                                                                                                                                                                                                                                                                                                                                                                                                                                                                                                      |

Disease-specific medication, medication with an indication specific to the disease (e.g., anastrozole is specifically indicated for breast cancer, whereas cyclophosphamide's indication is not specific to breast cancer); --, no disease-specific medication.

**Supplementary Table 7. Clinical diagnosis and phenotype of individuals with pathogenic/likely pathogenic or predicted loss-of-function (P/LP/LoF) variants stratified by ancestry.** Related to Figure 2, and Tables 1 and 2.

| <b>Ancestry</b> | <b>Observations, n</b> | <b>+Dx, n (%)</b> | <b>-Dx, n (%)</b> | <b>-Dx -Sx, n (%)</b> | <b>-Dx +Sx, n (%)</b> |
|-----------------|------------------------|-------------------|-------------------|-----------------------|-----------------------|
| African         | 121                    | 30 (25)           | 89 (74)           | 72 (81)               | 17 (19)               |
| Asian           | 29                     | 9 (31)            | 20 (69)           | 17 (85)               | 3 (15)                |
| European        | 259                    | 67 (26)           | 191 (74)          | 164 (86)              | 27 (14)               |
| Hispanic        | 182                    | 39 (21)           | 145 (80)          | 123 (85)              | 22 (15)               |
| Other           | 53                     | 12 (23)           | 42 (79)           | 36 (86)               | 6 (14)                |

Assessment of the clinical diagnosis and phenotypes of 644 observations of 303 pathogenic/likely pathogenic or predicted loss-of-function (P/LP/LoF) variants in 614 individuals stratified by self-reported ancestry. Observations were categorized into three distinct groups: 1) clinically diagnosed (+Dx), the individual with a P/LP/LoF variant had a prior clinical diagnosis for the genetic disorder corresponding to the variant; 2) no clinical diagnosis and no evidence of disease (-Dx -Sx), the individual with a P/LP/LoF variant lacked a prior clinical diagnosis for the corresponding genetic disorder and had no electronic health record (EHR) evidence of disease symptoms or findings; and 3) no clinical diagnosis but has evidence of disease (-Dx +Sx), the individual with a P/LP/LoF variant lacked a clinical diagnosis for the corresponding genetic disorder, but had EHR evidence of disease symptoms or findings.

**Supplementary Table 8. Symptom scores for 39 symptoms and their prevalence among clinically undiagnosed observations of variants and disease in individuals with pathogenic/likely pathogenic or predicted loss-of-function (P/LP/LoF) variants. Related to Figure 4 and Table 2**

| Disease                       | Sign/symptom                                                             | Matched phenotype from <i>Gotlieb et al.</i> <sup>1</sup> | Symptom score | No clinical diagnosis, n | Evidence of disease, n (% of no clinical diagnosis) |
|-------------------------------|--------------------------------------------------------------------------|-----------------------------------------------------------|---------------|--------------------------|-----------------------------------------------------|
| Prostate cancer               | Metastatic disease                                                       | Bone cancer metastatic                                    | 0.9829212     | 0                        | --                                                  |
| Cardiomyopathy                | Heart failure                                                            | Cardiac failure acute                                     | 0.9108916     | 154                      | 90 (58)                                             |
| Amyotrophic lateral sclerosis | Respiratory failure                                                      | Respiratory failure                                       | 0.856541      | 20                       | 4 (20)                                              |
| Familial hypercholesterolemia | Coronary heart disease                                                   | Coronary artery disease                                   | 0.7857806     | 6                        | 3 (50)                                              |
| Cardiomyopathy                | Valvular dysfunction                                                     | Cardiac valve disease                                     | 0.7401669     | 154                      | 23 (15)                                             |
| Cardiomyopathy                | Cardiac remodeling                                                       | Cardiac hypertrophy                                       | 0.6879898     | 154                      | 16 (10)                                             |
| Endometrial cancer            | Abnormal uterine bleeding                                                | Uterine haemorrhage                                       | 0.6631796     | 12                       | 2 (17)                                              |
| Familial hypercholesterolemia | Peripheral artery disease                                                | Peripheral vascular disorder                              | 0.6298026     | 6                        | 0 (0)                                               |
| Prostate cancer               | Anomalous DRE findings                                                   | Prostatic disorder                                        | 0.6086371     | 0                        | --                                                  |
| Endometrial cancer            | Endometrial hyperplasia and disorganization on biopsy                    | Endometrial hyperplasia                                   | 0.5750928     | 12                       | 1 (8.3)                                             |
| Endometrial cancer            | Thickened endometrium on imaging                                         | Endometrial hypertrophy                                   | 0.5683344     | 12                       | 0 (0)                                               |
| Familial breast cancer        | Axillary lymphadenopathy                                                 | Lymphadenopathy                                           | 0.5619201     | 106                      | 20 (19)                                             |
| Prostate cancer               | Urethral compression                                                     | Urethral obstruction                                      | 0.5502927     | 0                        | --                                                  |
| Familial breast cancer        | Mass                                                                     | Breast mass                                               | 0.5465219     | 106                      | 6 (5.7)                                             |
| Prostate cancer               | Elevated PSA                                                             | Prostatic specific antigen increased                      | 0.5405282     | 0                        | --                                                  |
| Colorectal cancer             | Exophytic colonic mass                                                   | Colonic polyp                                             | 0.5235142     | 17                       | 1 (5.9)                                             |
| Cardiomyopathy                | Abnormal cardiac exam findings                                           | Heart sounds abnormal                                     | 0.5215908     | 154                      | 17 (11)                                             |
| Familial hypercholesterolemia | Hypercholesterolemia                                                     | Hypercholesterolaemia                                     | 0.5175085     | 6                        | 1 (17)                                              |
| Colorectal cancer             | Obstructed lumen                                                         | Colonic obstruction                                       | 0.5063074     | 17                       | 0 (0)                                               |
| Amyotrophic lateral sclerosis | Bulbar symptoms (dysarthria, dysphagia, facial weakness, tongue atrophy) | Facial paresis                                            | 0.493729      | 20                       | 0 (0)                                               |
| Prostate cancer               | Infiltration to genitourinary system                                     | Haematuria                                                | 0.4768623     | 0                        | --                                                  |
| Monogenic diabetes            | Insulin perturbations                                                    | Insulin resistance                                        | 0.4752398     | 0                        | --                                                  |
| Familial hypercholesterolemia | Corneal arcus                                                            | Corneal deposits                                          | 0.4716786     | 6                        | 1 (17)                                              |

|                               |                                     |                              |           |     |         |
|-------------------------------|-------------------------------------|------------------------------|-----------|-----|---------|
| Endometrial cancer            | Enlarged uterus/abdominal mass      | Uterine enlargement          | 0.470359  | 12  | 0 (0)   |
| Monogenic diabetes            | Dysregulated glycemic control       | Blood glucose increased      | 0.4085338 | 0   | --      |
| Familial hypercholesterolemia | Xanthoma                            | Xanthoma                     | 0.4019195 | 6   | 0 (0)   |
| Colorectal cancer             | Occult bleeding or melena           | Faecal occult blood positive | 0.3889438 | 17  | 3 (18)  |
| Amyotrophic lateral sclerosis | Labile affect                       | Emotional disorder           | 0.3856494 | 20  | 0 (0)   |
| Monogenic diabetes            | Acanthosis nigricans                | Acanthosis nigricans         | 0.358083  | 0   | --      |
| Familial breast cancer        | Imaging anomalies                   | Breast microcalcification    | 0.3556099 | 106 | 5 (4.7) |
| Retinitis pigmentosa          | Nyctalopia and glare sensitivity    | Night blindness              | 0.3528767 | 168 | 0 (0)   |
| Monogenic diabetes            | Polyuria, polydipsia, polyphagia    | Polyuria                     | 0.3449517 | 0   | --      |
| Retinitis pigmentosa          | Progressive, peripheral vision loss | Tunnel vision                | 0.3432615 | 168 | 3 (1.8) |
| Amyotrophic lateral sclerosis | Asymmetric limb weakness            | Muscular weakness            | 0.2832084 | 20  | 1 (5)   |
| Endometrial cancer            | Pelvic pain                         | Pelvic pain                  | 0.2263445 | 12  | 1 (8.3) |
| Familial breast cancer        | Dermatological changes              | Breast tenderness            | 0.1866282 | 106 | 0 (0)   |
| Amyotrophic lateral sclerosis | Muscle fasciculations               | Muscle twitching             | 0.185048  | 20  | 0 (0)   |
| Familial breast cancer        | Nipple abnormalities                | Breast discharge             | 0.1665234 | 106 | 0 (0)   |
| Familial breast cancer        | Histopathological findings          | Breast enlargement           | 0.1300308 | 106 | 2 (1.9) |

No clinical diagnosis, observations of variants in individuals lacking a corresponding clinical diagnosis; evidence of disease, clinically undiagnosed observations that had electronic health record evidence of symptomatic disease; symptom score, on an ordinal scale ranging from 0 (lowest risk of hospitalization or death) to 1 (highest risk of hospitalization or death) from a previously published study<sup>1</sup>; --, not applicable as all observations for monogenic diabetes and prostate cancer were diagnosed with the corresponding disease.

1. Gottlieb A, Hoehndorf R, Dumontier M, Altman RB. Ranking adverse drug reactions with crowdsourcing. *J Med Internet Res* 2015; **17**. DOI:10.2196/jmir.3962.
